# Supplementary material for: Facile solvothermal synthesis of BiOCl–TiO2heterostructures with enhanced photocatalytic activity
Source: Royal Society of Chemistry journal article supplement (doi:10.1039/c4ce00596a), 2014-05-27
Supplement: c4ce00596a1.pdf [file c4ce00596a1.pdf]

## Supporting Information

# Facile solvothermal synthesis of BiOCl-TiO<sub>2</sub> heterostructures with enhanced photocatalytic activity

Dongfeng Sun<sup>a</sup>, Junping Li<sup>b</sup>, Lei He<sup>a</sup>, Bin Zhao<sup>a</sup>, Tingyu Wang<sup>a</sup>, Ruixing Li<sup>a</sup>, Shu Yin<sup>c</sup>, Zhihai Feng<sup>b</sup> and Tsugio Sato<sup>c</sup>

<sup>a</sup> Key Laboratory of Aerospace Materials and Performance (Ministry of Education), School of Materials Science and Engineering, Beihang University, Beijing 100191, China

<sup>b</sup> Aerospace Research Institute of Materials & Processing Technology, No. 1 Nan Da Hong Men Road, Fengtai District, Beijing 100076, China

<sup>c</sup> Institute of Multidisciplinary Research for Advanced Materials, Tohoku University, 2-1-1 Katahira, Aoba-ku, Sendai 980-8577, Japan

Corresponding author:

**Ruixing Li**, Ph.D.,  
Professor

School of Materials Science and Engineering, Beihang University  
(formerly *Beijing University of Aeronautics and Astronautics*)  
Xueyuanlu No.37, School of materials science and engineering, Beijing 100191,  
China  
TEL / FAX: 86-10-8231-6500  
E-mail: [ruixingli@yahoo.com](mailto:ruixingli@yahoo.com)

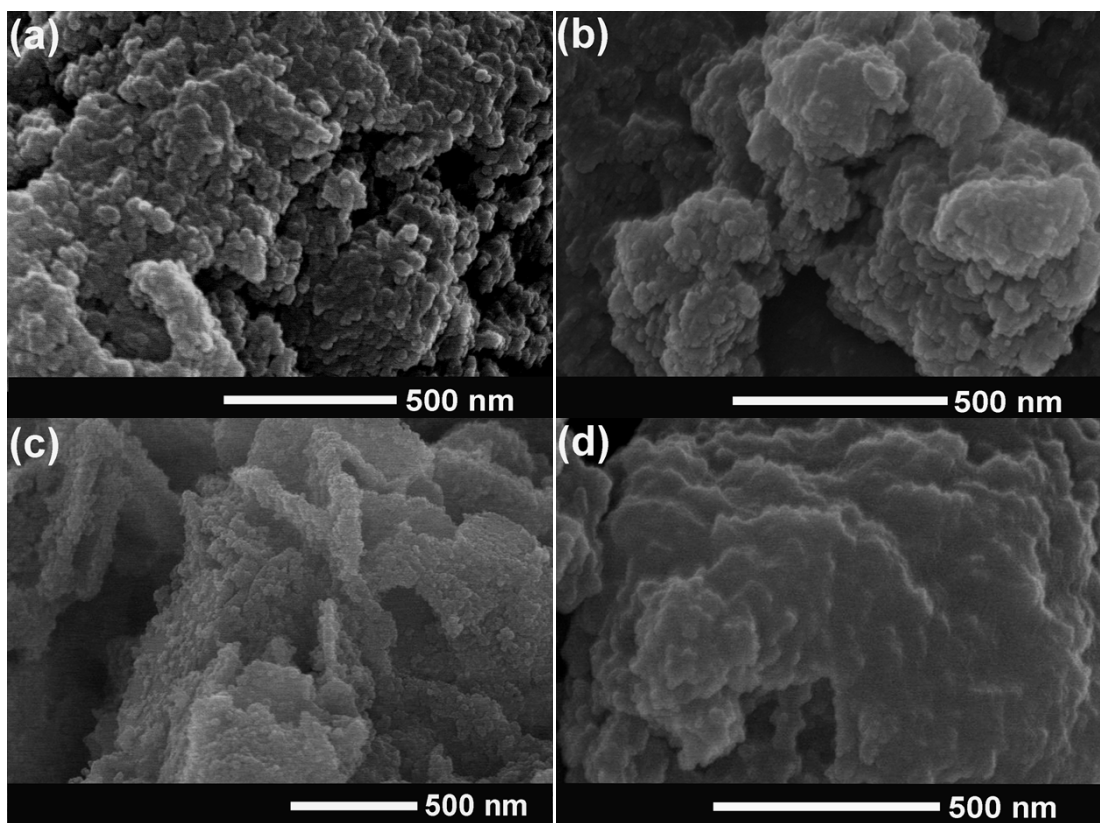

**Figure S1.** SEM images of BiOCl-TiO<sub>2</sub> (Bi:Ti = 1:3) synthesized solvothermally at (a) 120 °C, (b) 150 °C, (c) 180 °C and (d) 210 °C for 12 h.

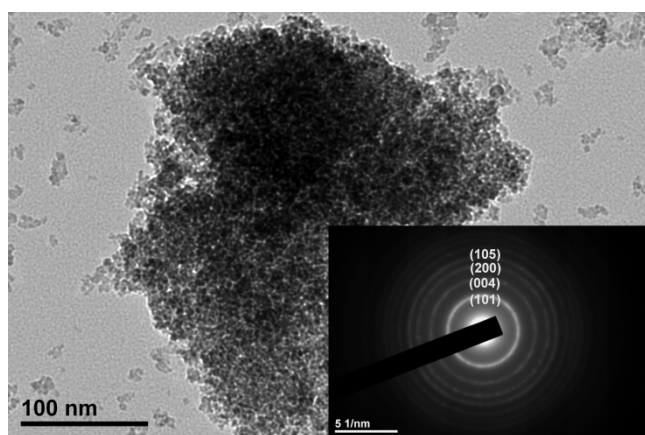

**Figure S2.** TEM image of BiOCl-TiO<sub>2</sub> (Bi:Ti = 1:3) synthesized solvothermally at 120 °C for 12 h, with corresponding selected area electron diffraction pattern (inset).

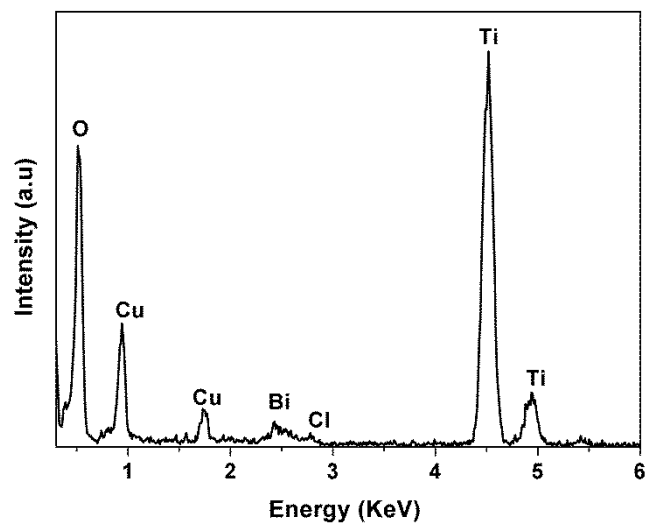

**Figure S3.** EDS spectrum of BiOCl-TiO<sub>2</sub> (Bi:Ti = 1:3) synthesized solvothermally at 120 °C for 12 h.

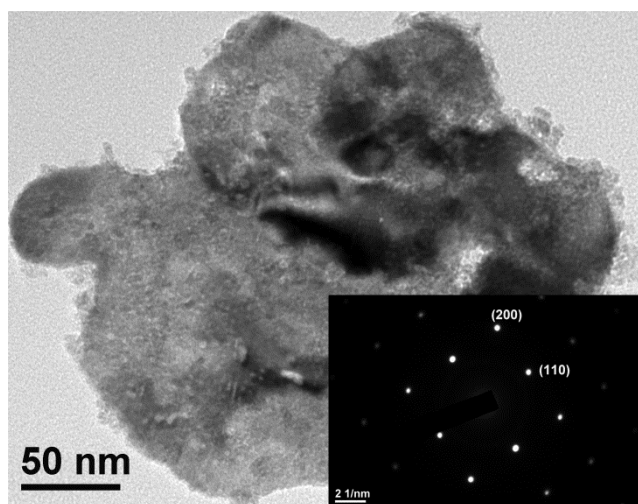

**Figure S4.** TEM image of BiOCl-TiO<sub>2</sub> (Bi:Ti = 1:3) synthesized solvothermally at 180 °C for 0.5h, with corresponding selected area electron diffraction pattern (inset).

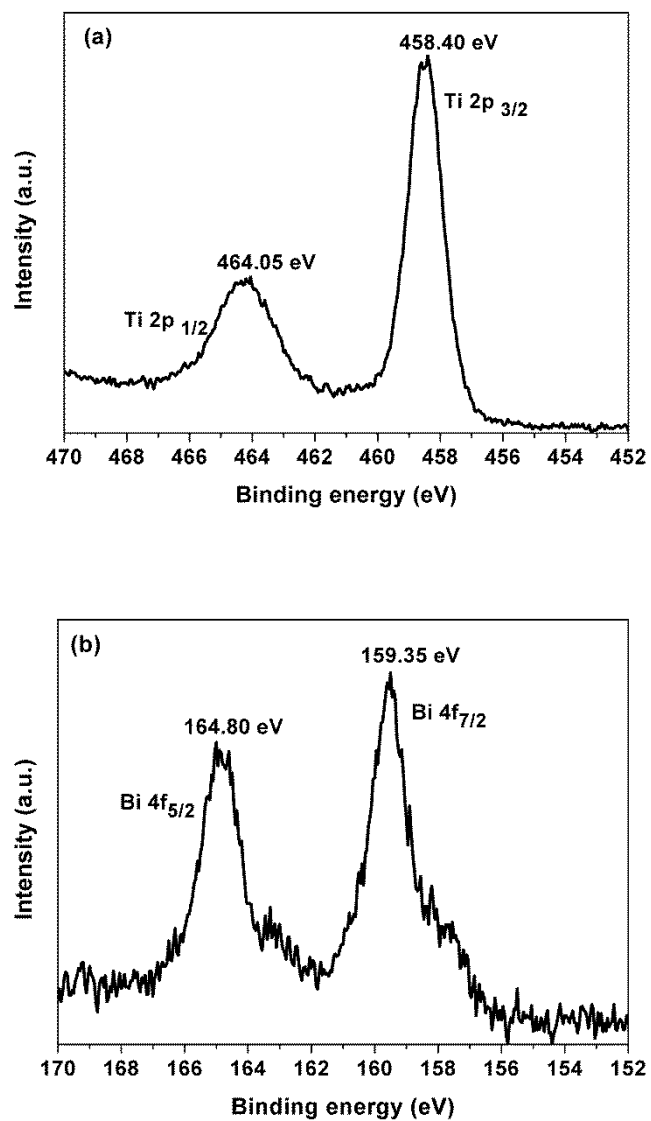

**Figure S5.** XPS spectra of BiOCl-TiO<sub>2</sub> (Bi:Ti = 1:3) synthesized solvothermally at 120 °C for 12 h : (a) Ti 2p; (b) Bi 4f.

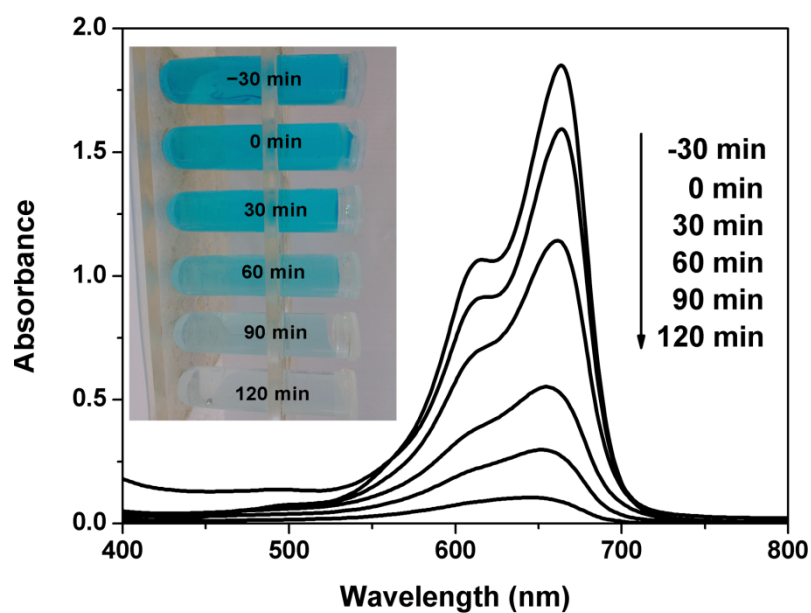

**Figure S6.** Absorption changes of MB solution under simulated sunlight illumination in the presence of BiOCl-TiO<sub>2</sub> (Bi:Ti = 1:3) synthesized solvothermally at 180 °C for 12.

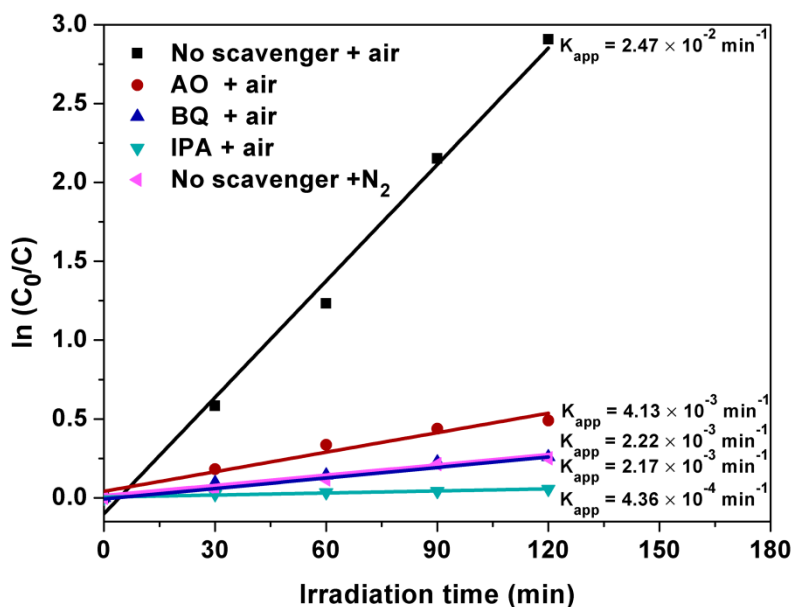

**Figure S7.** Kinetic fit for the degradation of MB with different scavengers under simulated sunlight illumination.

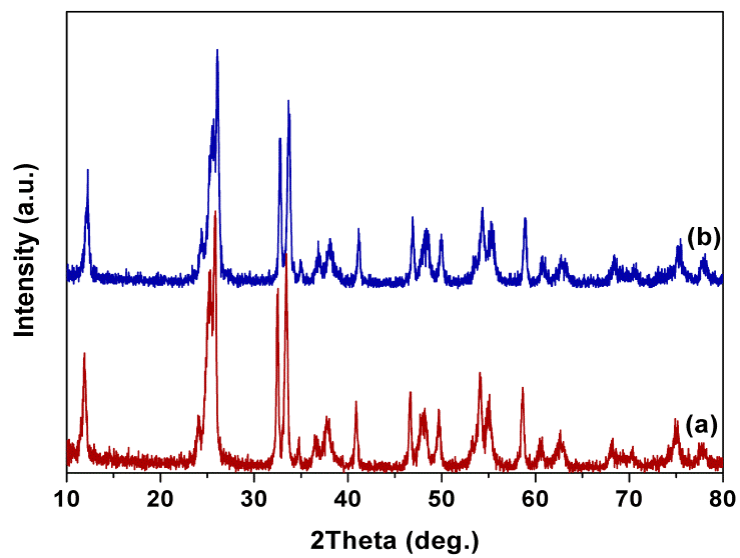

**Figure S8.** XRD patterns of the BiOCl-TiO<sub>2</sub> (Bi:Ti = 1:3) before the photocatalytic reaction (a) and after the catalytic reaction (b).
